# Supplementary material for: Design and photovoltaic characterization of dialkylthio benzo[1,2-b:4,5-b′]dithiophene polymers with different accepting units
Source: Royal Society of Chemistry journal article supplement (doi:10.1039/c5cp00349k), 2015-01-01
Supplement: c5cp00349k1.pdf [file c5cp00349k1.pdf]

Electronic Supplementary Information

**Design and photovoltaic characterization of dialkylthio benzo[1,2-b:4,5-b']dithiophene polymers with different accepting units**

Guidong Ge, Jinan Gu, Enwei Zhu, Jiefeng Hai, Linyi Bian, Jiangsheng Yu, Fujun

Zhang, Zhongsheng Xu, Wanli Ma and Weihua Tang

**Table of Contents**

|                                                                               |            |
|-------------------------------------------------------------------------------|------------|
| <b>1. Synthesis of monomers.....</b>                                          | <b>S2</b>  |
| <b>2. NMR Spectra.....</b>                                                    | <b>S6</b>  |
| <b>3. Thermal properties of polymers and electrochemical calculation.....</b> | <b>S13</b> |
| <b>4. Complete PSC devices data.....</b>                                      | <b>S13</b> |

## 1. Synthesis of monomers

All chemicals and solvents were purchased from Sigma-Aldrich Co. and used without further purification. Toluene, THF, dichloromethane and diethyl ether were freshly distilled before use. The monomers DTBTQx,<sup>[1]</sup> DTBO<sup>[2]</sup> and TPD<sup>[3]</sup> were synthesized according to the procedures in literature illustrated in Scheme S1.

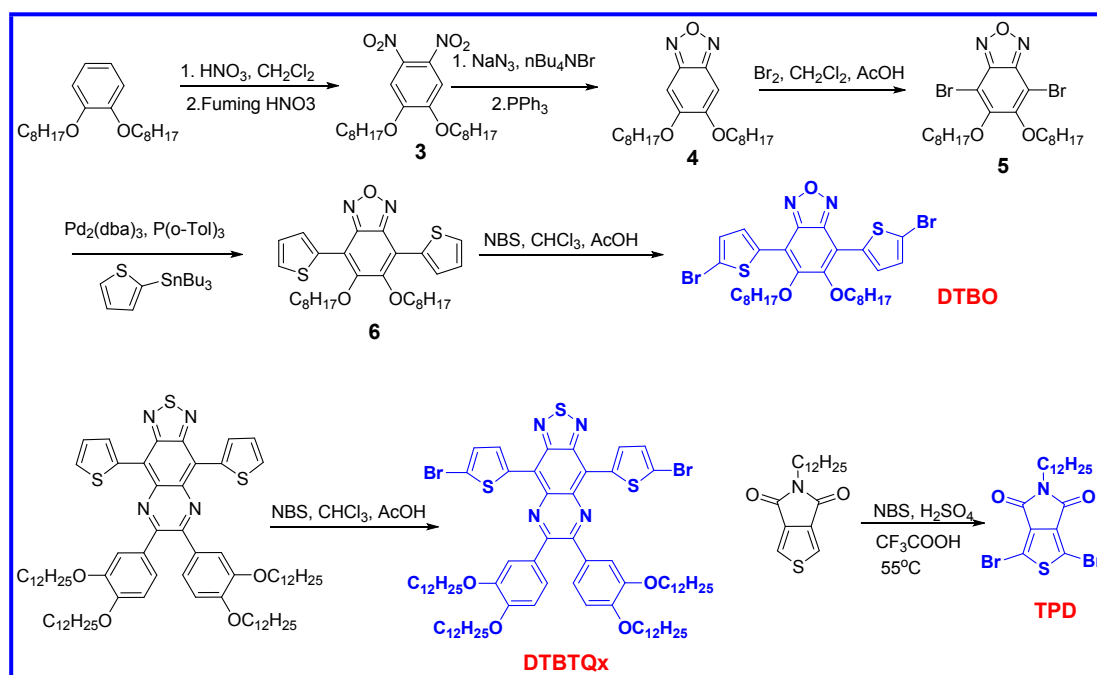

**Scheme S1.** Synthesis of monomers DTBO, DTBTQx and TPD.

**1,2-Dinitro-4,5-bis(octyloxy)benzene (3).** 65% HNO<sub>3</sub> was added dropwise to a 10°C cooled mixture solution of 1,2-bis(octyloxy)benzene (10 g, 29.9 mmol), CH<sub>2</sub>Cl<sub>2</sub> (140 mL) and AcOH (140 mL). The reaction mixture was warmed to rt and stirred for 1 h. The mixture was then cooled to 10°C before fuming HNO<sub>3</sub> (50 mL) was added. Before being poured into ice-water, the mixture was warmed to room temperature and stirred for 40 h. The CH<sub>2</sub>Cl<sub>2</sub> layer was separated and the aqueous phase extracted with CH<sub>2</sub>Cl<sub>2</sub>. The organic phases were combined, washed sequentially with water, sat. NaHCO<sub>3</sub> (aq), and brine, then over dried with MgSO<sub>4</sub> and concentration. The crude product was recrystallized from EtOH. Yield: 10 g (80%), yellow solid. <sup>1</sup>H NMR (500 MHz, CDCl<sub>3</sub>) δ: 7.29 (s, 2H), 4.10 (t, *J* = 6.5 Hz, 4H), 1.91–1.83 (m, 4H), 1.52–1.43 (m, 4H), 1.38–1.26 (m, 16H), 0.89 (t, *J* = 6.9 Hz, 6H).

**5,6-Bis(octyloxy)benzo[c][1,2,5]oxadiazole (4).** Compound 3 (1.7 g, 4 mmol), NaN<sub>3</sub> (1.3 g, 20 mmol), and *n*-Bu<sub>4</sub>NBr (260 mg, 0.8 mmol) was added in 20ml toluene and refluxed for 12h. Then PPh<sub>3</sub> (1.26 g, 4.8 mmol) was added and the

mixture heated under reflux for an additional 24 h. The reaction system was cooled to room temperature and filtered through a short silica plug; the solvent was removed by pressure evaporation and an off-white solid was obtained. The final solid was recrystallized in ethanol, and yielded 1.3 g (60%) of the target compound **5**. <sup>1</sup>H NMR (500 MHz, CDCl<sub>3</sub>) δ: 6.80 (s, 2H), 4.06 (t, *J* = 6.5 Hz, 4H), 1.92–1.86 (m, 4H), 1.50–1.47 (m, 4H), 1.37–1.27 (m, 16H), 0.89 (t, *J* = 6.7 Hz, 6H).

**4,7-Dibromo-5,6-bis(octyloxy)benzo[c][1,2,5]oxadiazole (5)**. Br<sub>2</sub> (0.85 mL, 16.6 mmol) were added sequentially to a solution of compound **4** (1.5 g, 4.0 mmol) in CH<sub>2</sub>Cl<sub>2</sub> (80 mL) and AcOH (10 mL). The resulting mixture was stirred for 3 days at room temperature and then poured into then poured into aqueous NaOH solution (10 g in 200 mL). The aqueous phase was extracted with CH<sub>2</sub>Cl<sub>2</sub>; the combined organic extracts were washed with brine and concentrated under reduced pressure and purified through column chromatography on silica gel eluting with dichloromethane: petroleum ether (1:9, v/v) to yield a white solid **6** (2.0 g, 72%). <sup>1</sup>H NMR (500 MHz, CDCl<sub>3</sub>) δ: 4.15 (t, *J* = 6.6 Hz, 4H), 1.90–1.82 (m, 4H), 1.53–1.47 (m, 4H), 1.40–1.27 (m, 16H), 0.90 (t, *J* = 6.5 Hz, 6H).

**5,6-Bis(octyloxy)-4,7-di(thien-2-yl)benzo[c][1,2,5]oxadiazole (6)**. Compound **5** (665 mg, 1.25 mmol), Pd<sub>2</sub>(dba)<sub>3</sub> (46 mg, 0.05 mmol), tri-*o*-tolylphosphine (122 mg, 0.40 mmol) and 2-tributylstannylthiophene (994 μL, 3.13 mmol) was added into a round bottom flask purged with nitrogen. Dry toluene (10 mL) was then added to leave the reaction mixture heated under reflux for 16 h under N<sub>2</sub>. The reaction mixture was concentrated directly under vacuum, and purified by column chromatography on silica gel eluting with chloroform: petroleum ether (1:10, v/v) afforded the title product as a yellow solid (470 mg, 70% yield). <sup>1</sup>H NMR (500 MHz, CDCl<sub>3</sub>) δ: 8.46 (dd, *J* = 3.8, 1.1 Hz, 2H), 7.50 (dd, *J* = 5.1, 1.0 Hz, 2H), 7.22 (dd, *J* = 5.1, 3.9 Hz, 2H), 4.15 (t, *J* = 7.3 Hz, 4H), 2.02–1.97 (m, 4H), 1.46–1.43 (m, 4H), 1.33–1.22 (m, 16H), 0.90 (t, *J* = 7.0 Hz, 6H).

**4,7-Bis(5-bromothien-2-yl)-5,6-bis(octyloxy)benzo[c][1,2,5]oxadiazole (DTBO)**.<sup>[1]</sup> NBS (533 mg, 3 mmol) was added in one portion to a solution of **6** (810 mg, 1.5 mmol) in CHCl<sub>3</sub> (45 ml) and glacial AcOH (45 mL) and then the mixture was stirred at room temperature for 20 h in the dark. The reaction mixture was concentrated directly onto Celite under vacuum, and purified by column chromatography on silica gel eluting with chloroform:petroleum ether (1:9, v/v) to

afford **M3** as an orange solid (1.4 g, 80% yield).  $^1\text{H}$  NMR (500 MHz,  $\text{CDCl}_3$ )  $\delta$ : 8.25 (d,  $J = 4.2$  Hz, 2H), 7.17 (d,  $J = 4.1$  Hz, 2H), 4.15 (t,  $J = 7.3$  Hz, 4H), 2.02-1.96 (m, 4H), 1.51-1.43 (m, 4H), 1.39-1.26 (m, 16H), 0.90 (t,  $J = 6.9$  Hz, 6H).

**6,7-Bis(3,4-bis(dodecyloxy)phenyl)-4,9-bis(5-bromothiophen-2-yl)-[1,2,5]thiadiazolo[3,4-g]quinoxaline (DBTQx).** To a solution of 6,7-bis(3,4-bis(dodecyloxy)-phenyl)-4,9-di(thiophen-2-yl)-[1,2,5]thiadiazolo[3,4-g]-quinoxaline (534 mg, 0.43 mmol) in anhydrous THF (100 mL) was added with N-bromosuccinimide (NBS) (168 mg, 0.95 mmol) in one portion. The mixture was stirred in the dark at  $0^\circ\text{C}$  overnight. The mixture was then poured into water and extracted with extracted by  $\text{CH}_2\text{Cl}_2$ . The organic layer was concentrated via rotary evaporation. The crude residue was purified by column chromatography on silica gel (ethyl acetate/petroleum ether, 1:20 v/v) to give pure DTBTQx as a purple black solid (538 mg, 89%).  $^1\text{H}$  NMR (500 MHz,  $\text{CDCl}_3$ )  $\delta$  8.74 (d,  $J = 4.2$  Hz, 2H), 7.69 (d,  $J = 1.4$  Hz, 2H), 7.13 (d,  $J = 4.2$  Hz, 2H), 7.05 (dd,  $J = 8.3, 1.6$  Hz, 2H), 6.78 (d,  $J = 8.4$  Hz, 2H), 4.17 (t,  $J = 6.3$  Hz, 4H), 4.06 (t,  $J = 6.5$  Hz, 4H), 1.95-1.84 (m, 8), 1.61-1.48 (m, 8H), 1.44 – 1.20 (m, 64H), 0.92-0.85 (m, 12H);  $^{13}\text{C}$  NMR (125 MHz,  $\text{CDCl}_3$ )  $\delta$  152.77, 150.79, 150.61, 149.10, 137.15, 133.51, 132.88, 130.32, 129.31, 124.56, 119.89, 115.41, 111.95, 69.37, 69.07, 31.94, 29.71, 29.39, 26.34, 26.13, 25.99, 22.69, 14.10.

## 2. NMR spectra

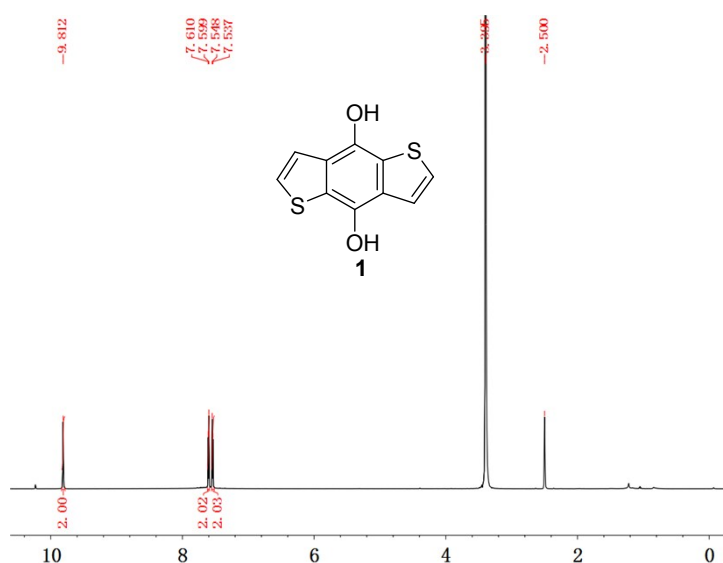

**Figure S1.**  $^1\text{H}$  NMR spectrum of compound **1**.

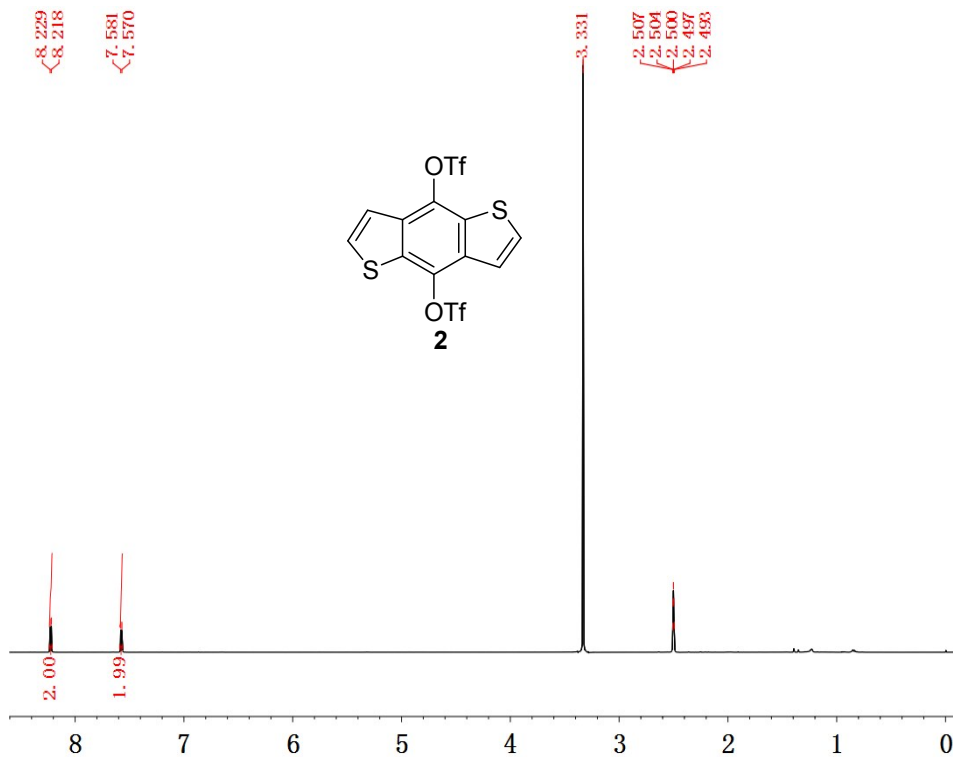

**Figure S2.** <sup>1</sup>H NMR spectrum of compound 2.

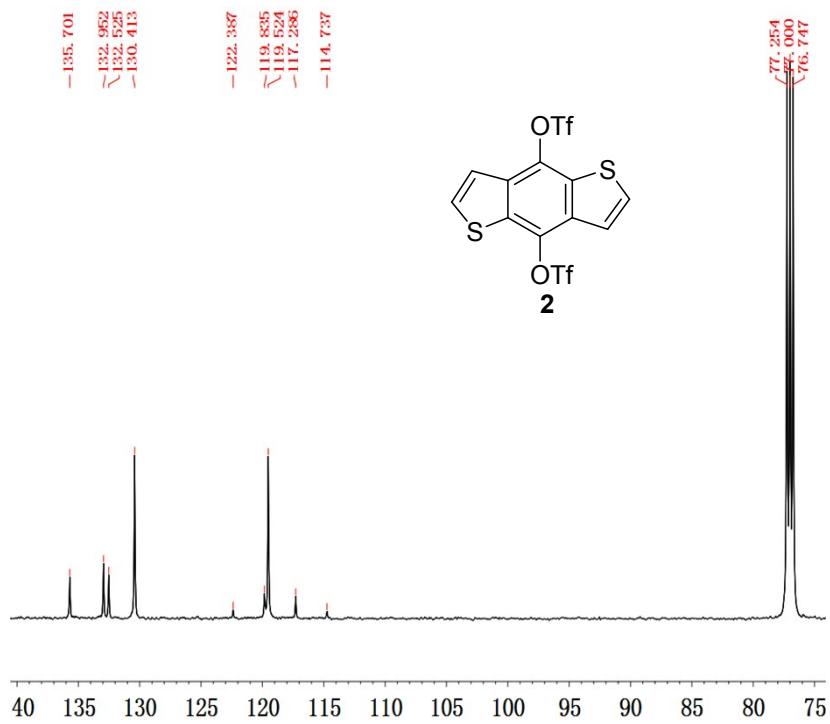

**Figure S3.** <sup>13</sup>C NMR spectrum of compound 2.

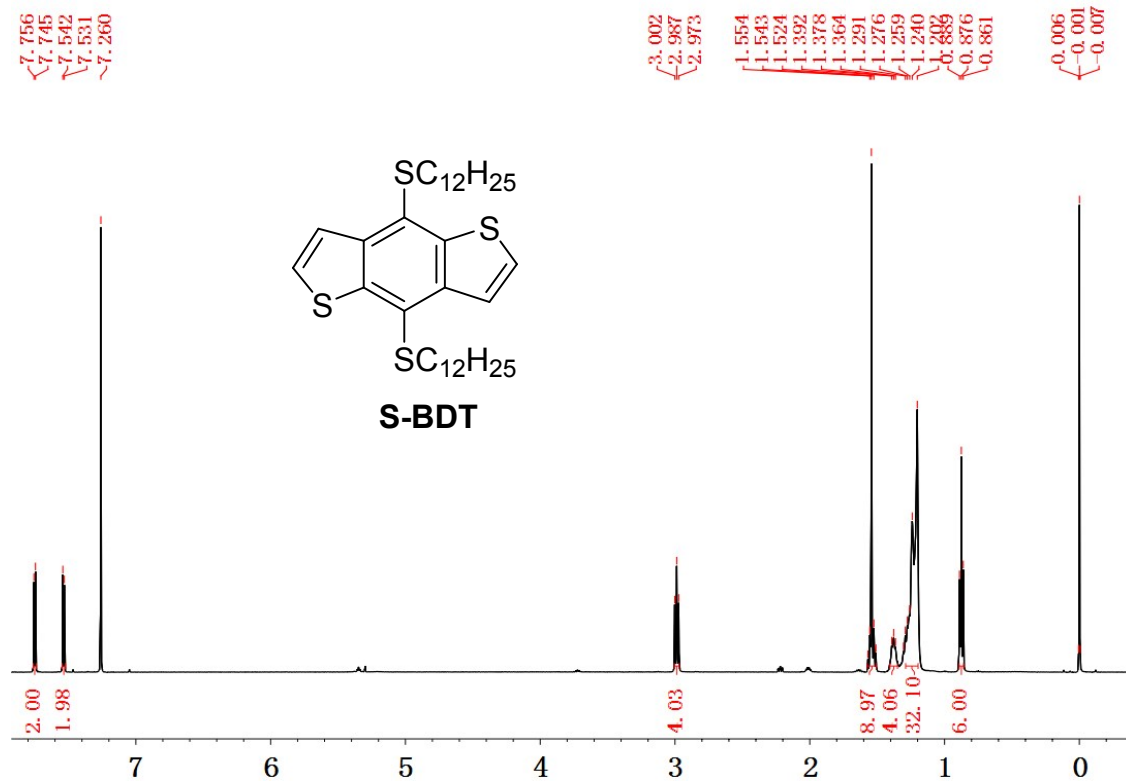

Figure S4. <sup>1</sup>H NMR spectrum of S-BDT.

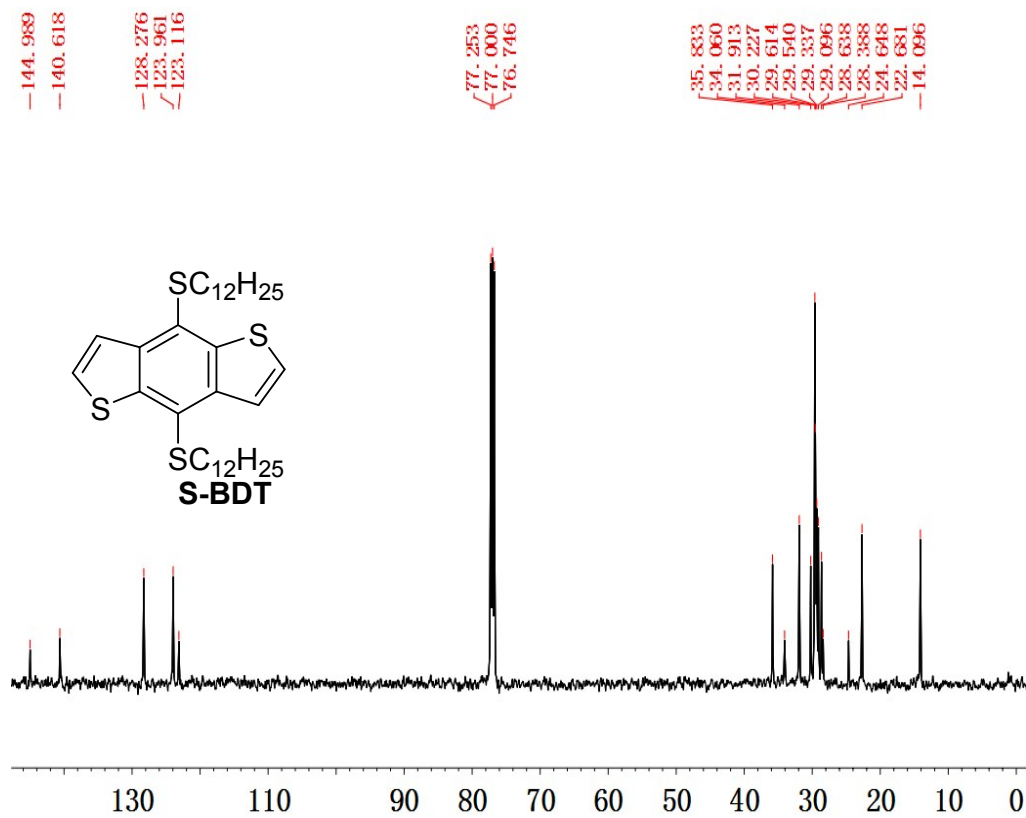

Figure S5. <sup>13</sup>C NMR spectrum of S-BDT.

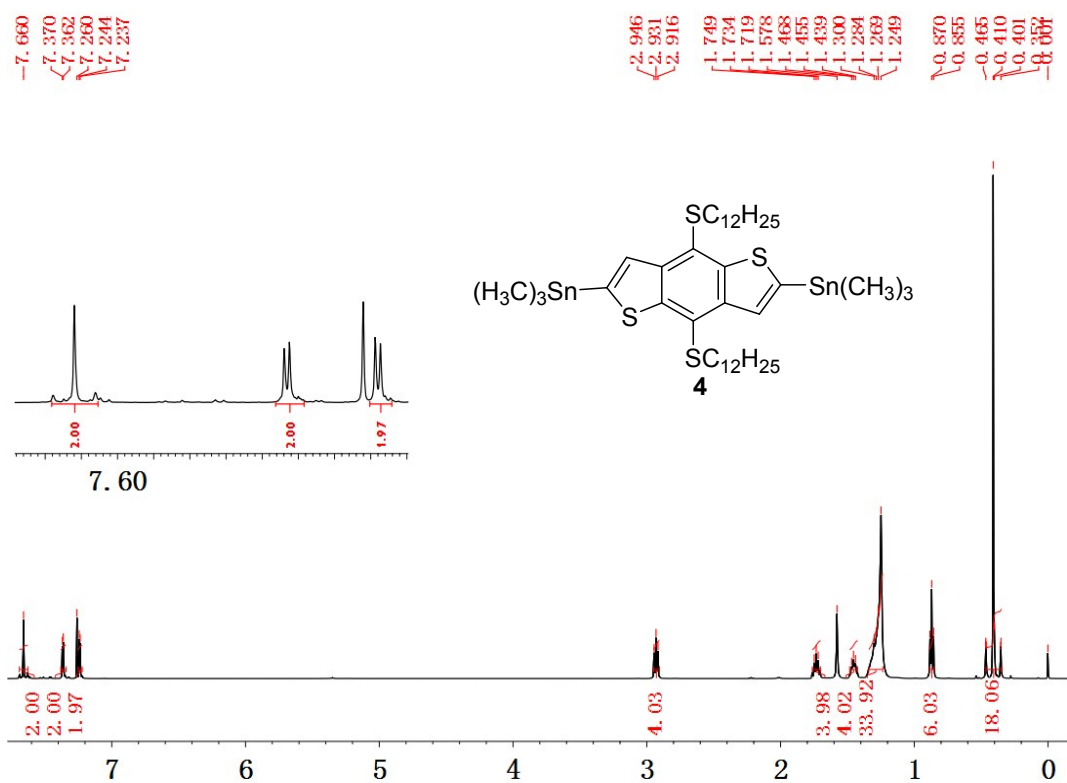

**Figure S6.** <sup>1</sup>H NMR spectrum of **M1**.

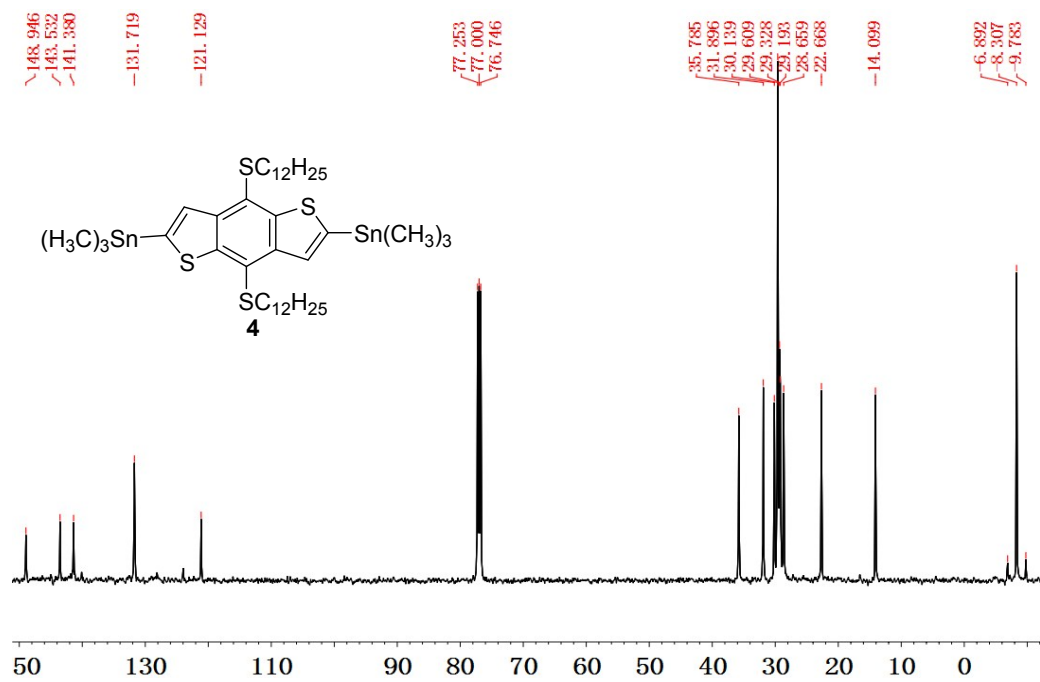

**Figure S7.** <sup>13</sup>C NMR spectrum of **M1**.

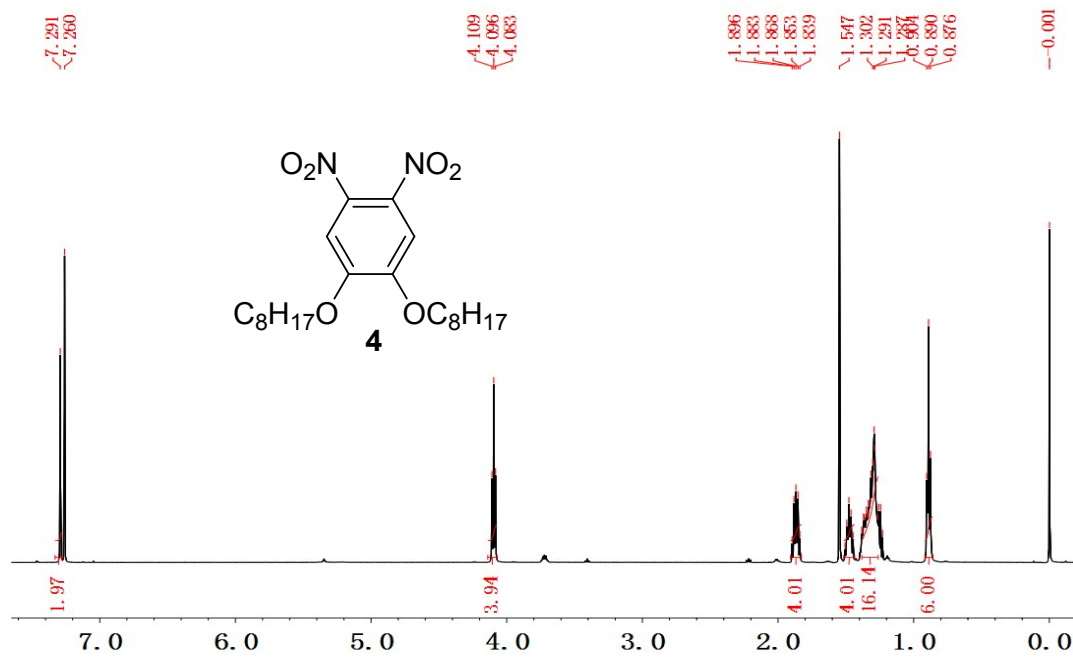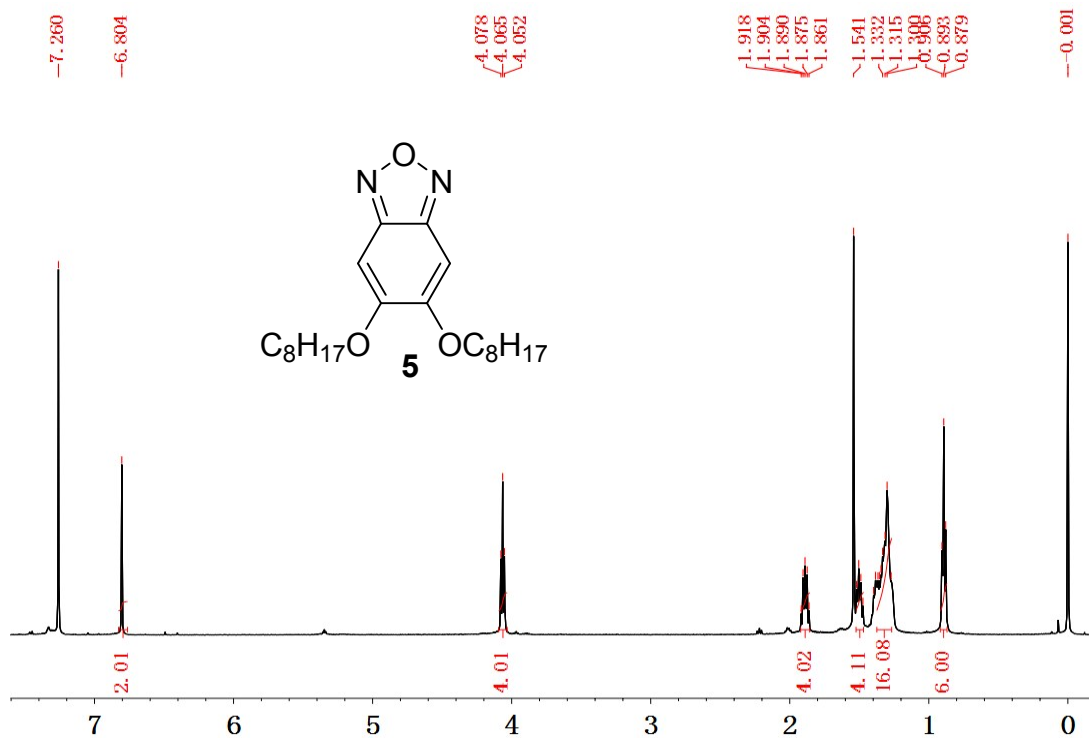



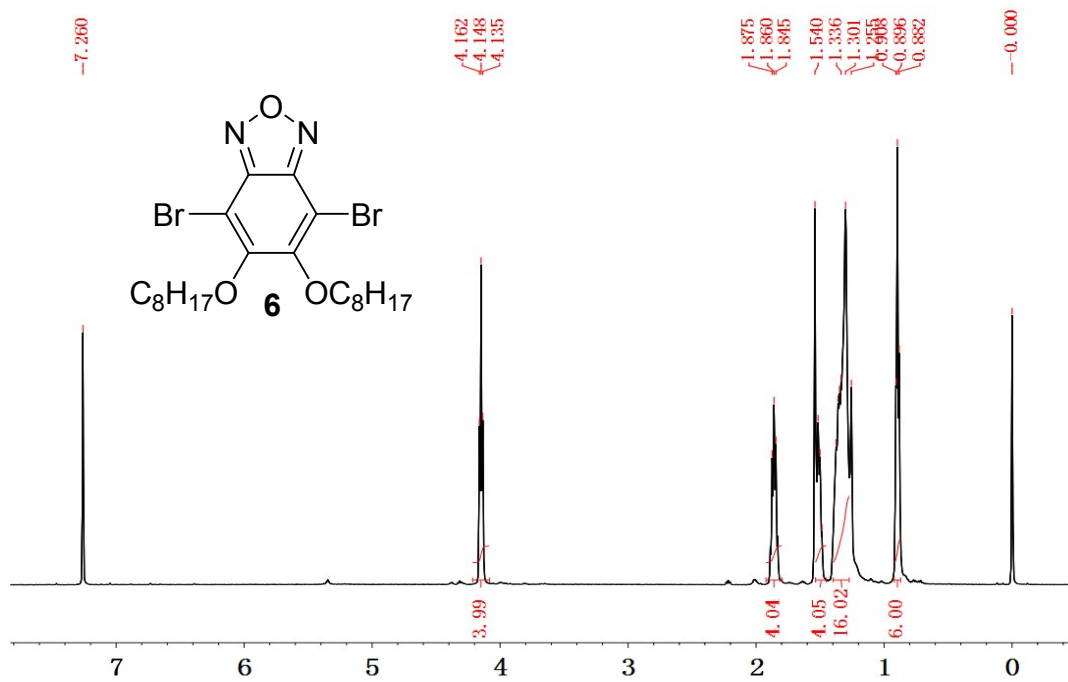

Figure S10.  $^1\text{H}$  NMR spectrum of compound 6.

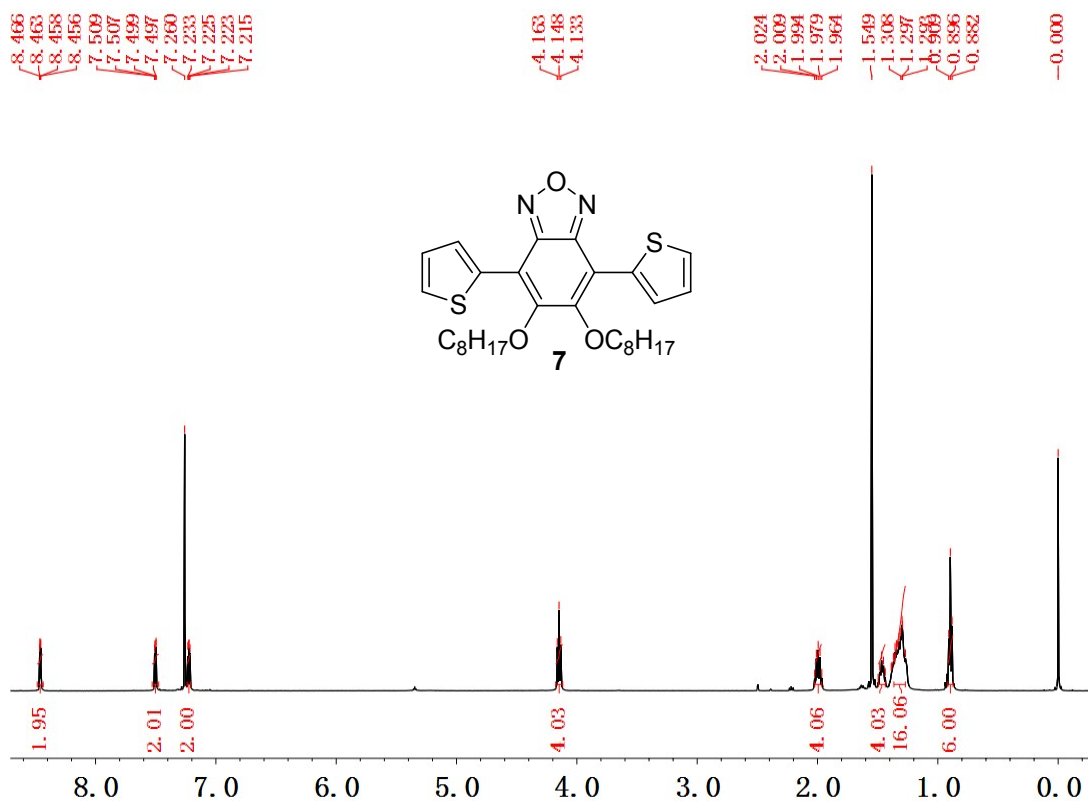

Figure S11.  $^1\text{H}$  NMR spectrum of compound 7.

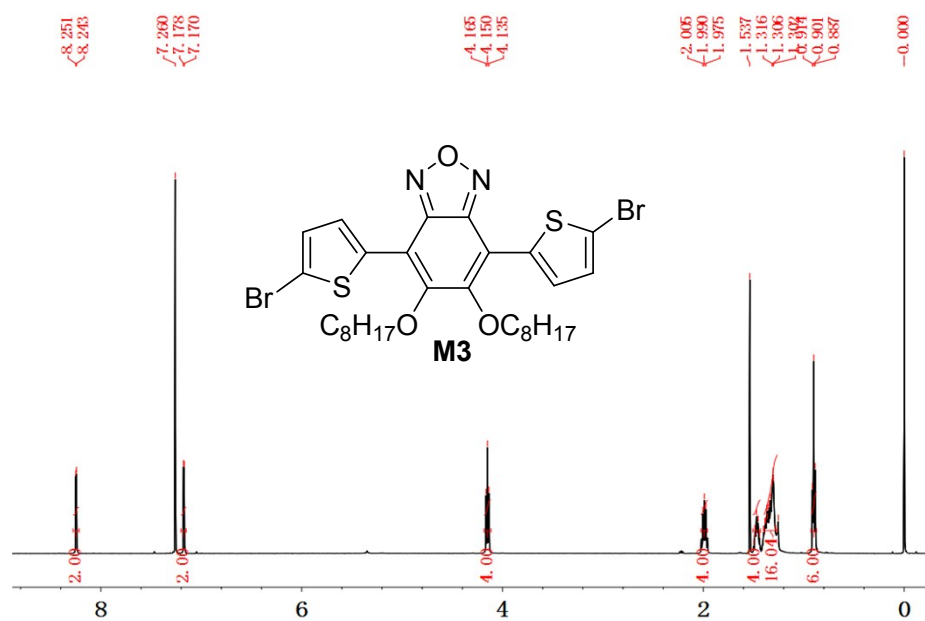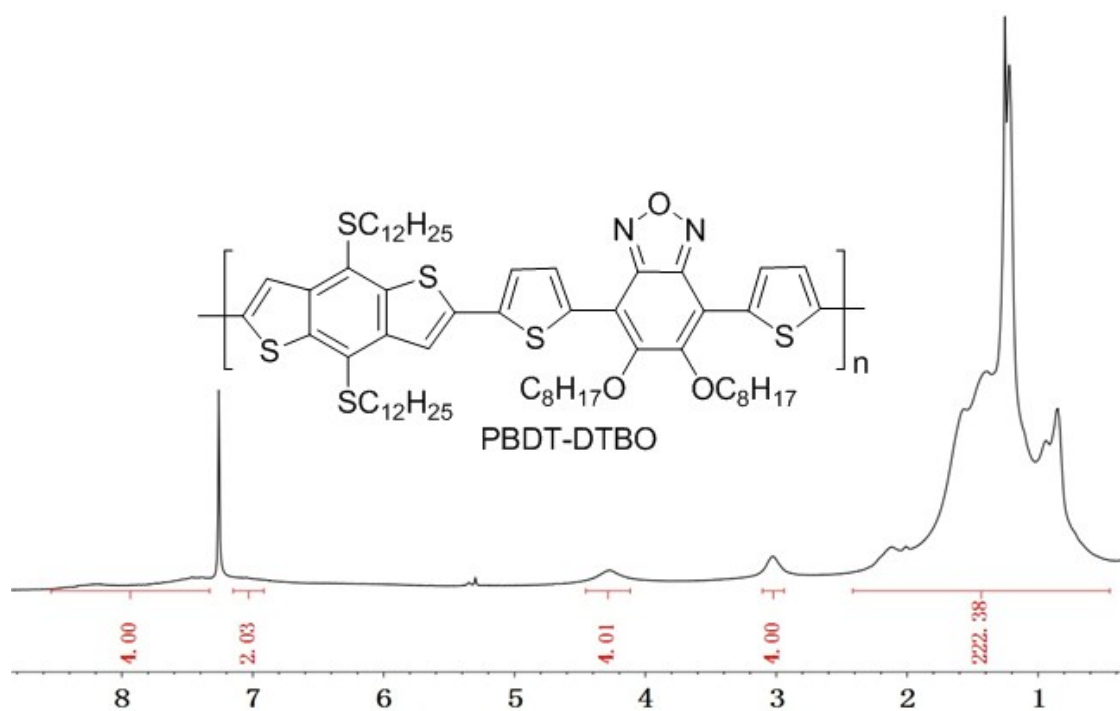

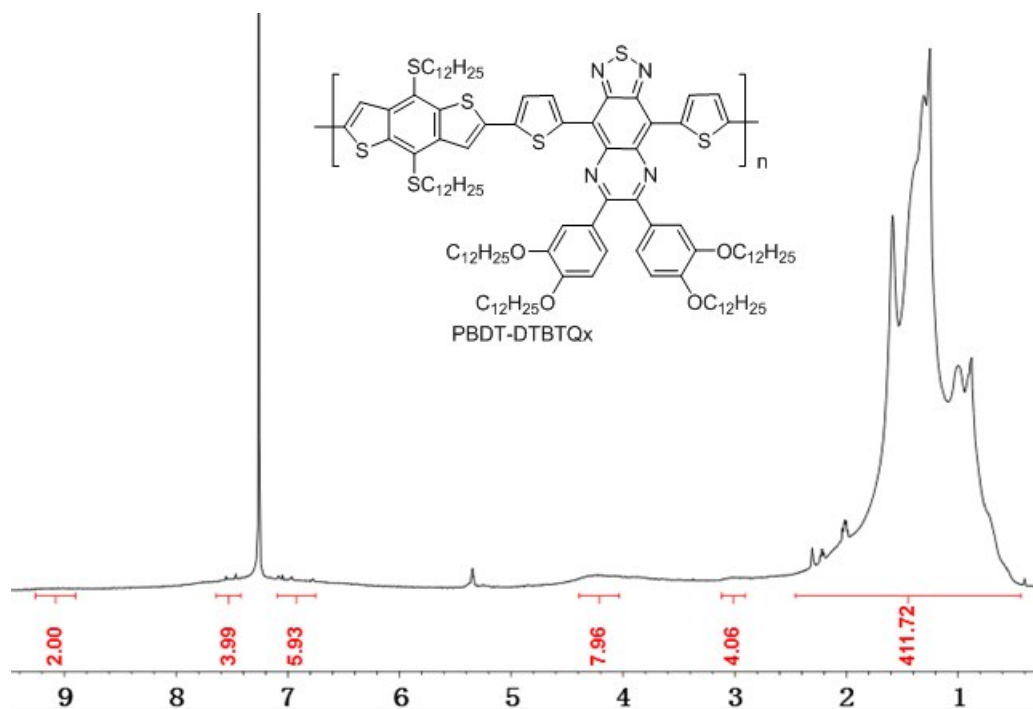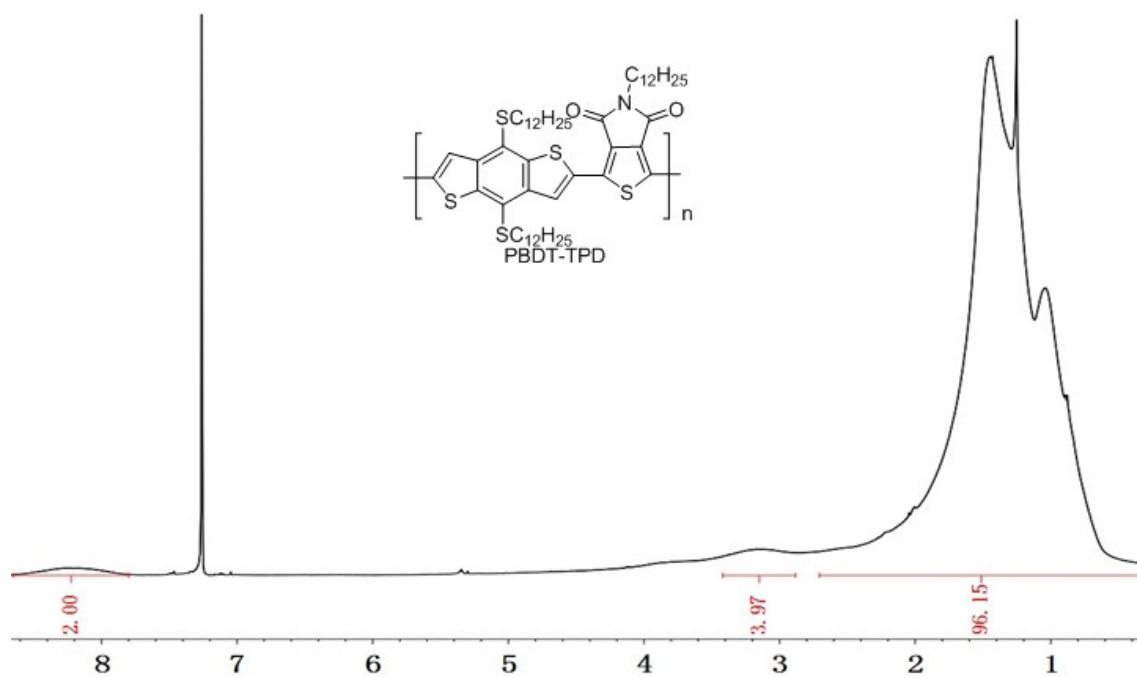

### 3. Thermal properties of polymers and electrochemical calculation

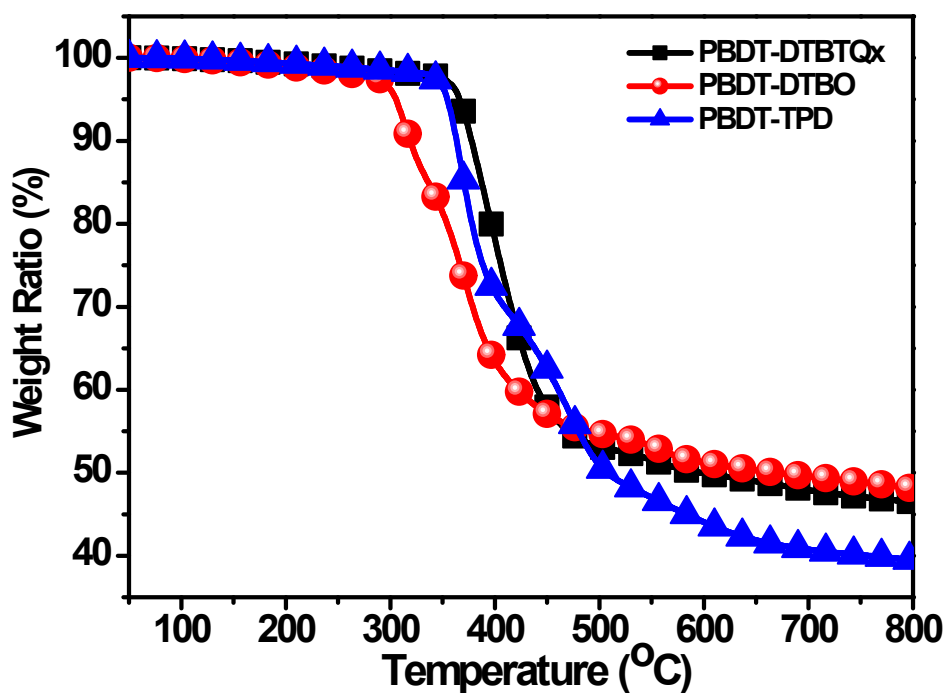

Fig.S16. TGA traces of polymers at heating rate of 10°C/min under an inert atmosphere.

The potential of ferrocene 0.40 V vs SCE is used as internal standard. According to the following equations we calculate the HOMO level of the polymers from the onset oxidation potentials ( $E_{\text{ox}}^{\text{onset}}$ ) and the LUMO levels using HOMO and  $E_g^{\text{opt}}$ , on the basis of 4.8 eV below vacuum for the energy level of Fc/Fc<sup>+</sup>.

$$\text{HOMO} = -e(E_{\text{ox}}^{\text{onset}} + 4.4) \text{ (eV)};$$

$$\text{LUMO} = \text{HOMO} + E_g^{\text{opt}} \text{ (eV)}$$

#### 4. Complete PSC devices data

**Table S1** Photovoltaic performance of polymer:PCBM devices

| Polymer:PCBM                    | Processing solvent          | D/A        | V <sub>oc</sub> [V] | J <sub>sc</sub> [mA/cm <sup>2</sup> ] | FF [%]      | PCE [%] <sup>g</sup>    |
|---------------------------------|-----------------------------|------------|---------------------|---------------------------------------|-------------|-------------------------|
| PBDT-DTBTQx/PC <sub>61</sub> BM | <i>o</i> -DCB               | 1:1        | 0.45                | 0.90                                  | 53.6        | 0.22 (0.21±0.01)        |
|                                 | <i>o</i> -DCB               | 4:5        | 0.48                | 0.95                                  | 53.3        | 0.24 (0.23±0.01)        |
|                                 | <i>o</i> -DCB +1%DIO        | 4:5        | 0.45                | 1.00                                  | 50.1        | 0.23 (0.21±0.02)        |
|                                 | CF+1%DIO                    | 4:5        | 0.46                | 0.92                                  | 49.1        | 0.21 (0.20±0.01)        |
| PBDT-TPD/PC <sub>61</sub> BM    | CF                          | 1:1        | 0.64                | 3.11                                  | 41.4        | 0.82 (0.80±0.02)        |
|                                 | CF+3%DIO                    | 1:1        | 0.74                | 2.85                                  | 38.7        | 0.82 (0.81±0.01)        |
|                                 | CF+3%DIO <sup>a</sup>       | 1:1        | 0.65                | 1.99                                  | 52.8        | 0.68 (0.67±0.01)        |
|                                 | CF+3%DIO <sup>b</sup>       | 1:1        | 0.76                | 1.65                                  | 47.7        | 0.60 (0.59±0.01)        |
|                                 | CF+3%DIO <sup>c</sup>       | 1:1        | 0.75                | 3.00                                  | 41.2        | 0.93 (0.91±0.02)        |
|                                 | CF+5%DIO                    | 1:1        | 0.78                | 2.02                                  | 38.4        | 0.61 (0.60±0.01)        |
|                                 | CF+3%DIO                    | 3:2        | 0.75                | 2.12                                  | 38.4        | 0.61 (0.60±0.01)        |
|                                 | <i>o</i> -DCB+1%DIO         | 1:1        | 0.78                | 2.08                                  | 32.6        | 0.53 (0.52±0.01)        |
|                                 | <b><i>o</i>-DCB+3%DIO</b>   | <b>1:1</b> | <b>0.80</b>         | <b>4.95</b>                           | <b>32.2</b> | <b>1.28</b> (1.26±0.03) |
| PBDT-DTBO/PC <sub>61</sub> BM   | <b>CF</b>                   | <b>1:1</b> | <b>0.83</b>         | <b>7.38</b>                           | <b>59.5</b> | <b>3.64</b> (3.60±0.04) |
|                                 | <b>CF<sup>a</sup></b>       | <b>1:1</b> | <b>0.83</b>         | <b>8.13</b>                           | <b>62.9</b> | <b>4.24</b> (4.19±0.05) |
|                                 | CF <sup>b</sup>             | 1:1        | 0.81                | 6.35                                  | 55.9        | 2.87 (2.83±0.04)        |
|                                 | CF <sup>e</sup>             | 1:1        | 0.83                | 7.38                                  | 47.3        | 2.90 (2.84±0.07)        |
|                                 | CF <sup>a,c</sup>           | 1:1        | 0.80                | 8.10                                  | 59.8        | 3.88 (3.82±0.06)        |
|                                 | CF+3%DIO                    | 1:1        | 0.80                | 6.27                                  | 46.1        | 2.31 (2.28±0.05)        |
|                                 | CF+3%DIO                    | 1:2        | 0.74                | 6.08                                  | 40.8        | 1.84 (1.81±0.04)        |
|                                 | CF+3%DIO <sup>d</sup>       | 1:1        | 0.70                | 4.62                                  | 44.5        | 1.44 (1.42±0.02)        |
|                                 | <i>o</i> -DCB+1%DIO         | 1:1        | 0.73                | 5.77                                  | 39.3        | 1.66 (1.62±0.04)        |
|                                 | CB+1%DIO                    | 1:1        | 0.77                | 4.21                                  | 43.9        | 1.42 (1.39±0.03)        |
| PBDT-DTBO/PC <sub>71</sub> BM   | CF                          | 1:1        | 0.70                | 12.77                                 | 45.1        | 4.03 (3.98±0.05)        |
|                                 | CF <sup>c</sup>             | 1:1        | 0.73                | 13.75                                 | 44.9        | 4.51 (4.46±0.06)        |
|                                 | <b>CF+1%DIO<sup>c</sup></b> | <b>1:1</b> | <b>0.83</b>         | <b>10.24</b>                          | <b>66.3</b> | <b>5.63</b> (5.52±0.12) |
|                                 | <b>CF+1%DIO<sup>f</sup></b> | <b>1:1</b> | <b>0.83</b>         | <b>9.69</b>                           | <b>66.5</b> | <b>5.35</b> (5.25±0.10) |
|                                 | CF+3%DIO                    | 1:1        | 0.84                | 9.41                                  | 58.8        | 4.65 (4.59±0.06)        |
|                                 | CF+5%DIO                    | 1:1        | 0.84                | 8.63                                  | 57.2        | 4.15 (4.12±0.04)        |
|                                 | CF+1%DIO                    | 1:2        | 0.81                | 8.27                                  | 66.2        | 4.43 (4.38±0.05)        |
|                                 | CF+3%DIO                    | 1:2        | 0.81                | 9.34                                  | 66.5        | 5.03 (4.98±0.06)        |
|                                 | CF+1%DIO                    | 1:3        | 0.81                | 6.60                                  | 59.2        | 3.16 (3.14±0.02)        |
|                                 | CF+1%DIO <sup>c</sup>       | 1:3        | 0.81                | 6.83                                  | 60.9        | 3.37 (3.34±0.03)        |

<sup>a</sup>annealing at 50°C, <sup>b</sup>annealing at 100°C, <sup>c</sup>spin-coating at 1200 rpm, <sup>d</sup>spin-coating at 1300 rpm, <sup>e</sup>concentration at 30 mg/mL, <sup>f</sup>spin-coating at 1500 rpm, <sup>g</sup>values in parentheses are average values and variances of 20 devices.

## References

- [1] Hai, J.; Yu, W.; Zhu, E.; Bian, L.; Zhang, J.; Tang, W. *Thin Solid Films* **2014**, *562*, 75-83.
- [2] Jiang, J-M.; Yang, P-A.; Chen, H-C.; Wei, K-H. *Chem. Commun.* **2011**, *47*, 8877-88979.
- [3] Zhu, E.; Ni, B.; Zhao, B.; Hai, J.; Bian, L.; Wu, H.; Tang, W. *Macromol. Chem. Phys.* **2014**, *215*, 227.
